# Supplementary material for: CD38 Inhibition Ameliorates Age-Related Cognitive Decline via a Choroid Plexus–Cerebrospinal Fluid–Hippocampus Axis
Source: Research Square preprint supplement (doi:10.21203/rs.3.rs-8330519/v1), 2026-01-06
Supplement: Supplementary file 1 [file 6e179e8cb2ad06366160dd01.docx]

[Supplemental Table 1](https://docs.google.com/document/d/1_Xfakk88QAsZcEuz6iV6hrBj0JPUns6u/edit)

[Supplemental Table 2](https://docs.google.com/spreadsheets/d/1m6CszsZvGfvFI5KjihexyIuOehgQRxqI/edit?usp=drive_web&ouid=118149051034723084023&rtpof=true)

[Supplemental Table 3](https://docs.google.com/spreadsheets/d/1diyNmjj0keQzgG3BxuP7XMuh4b7YCDLz/edit?usp=drive_web&ouid=118149051034723084023&rtpof=true)

[Supplemental Table 4](https://docs.google.com/spreadsheets/d/1GtF2qzTIwM_MGg6zprYy1qVnD8S7RCpd/edit?usp=drive_web&ouid=118149051034723084023&rtpof=true)

[Supplemental Table 5](https://docs.google.com/spreadsheets/d/1coQ3xgJUWSQu-HvBTJDVkUZ2QJx9EW9k/edit?usp=drive_web&ouid=118149051034723084023&rtpof=true)

[Supplemental Table 6](https://docs.google.com/spreadsheets/d/1QDJyGyWapZWUk3iiCBgO51qQJI7_RjL_/edit?usp=drive_web&ouid=118149051034723084023&rtpof=true)

[Supplemental Table 7](https://docs.google.com/spreadsheets/d/1PBASGdDqvIzT7FaiQXl8fXucwjOUlHYm/edit?usp=drive_web&ouid=118149051034723084023&rtpof=true)

[Supplemental Table 8](https://docs.google.com/spreadsheets/d/19fgNi36P0EwbYbp30-3vWKbSyhMEEsfp/edit?usp=drive_web&ouid=118149051034723084023&rtpof=true)

[Supplemental Table 9](https://docs.google.com/document/d/1islmAnBBqDoT_NAwlVjO3aqgbEAVPCHi/edit?usp=drive_web&ouid=118149051034723084023&rtpof=true)

[Supplemental Table 10](https://docs.google.com/spreadsheets/d/1vXCywSdsDcqRZpsyWlLDi8yNstHV71H6/edit?usp=drive_web&ouid=118149051034723084023&rtpof=true)
